# Supplementary material for: Influence of loblolly pine anatomical fractions and tree age on oil yield and composition during fast pyrolysis
Source: Royal Society of Chemistry journal article supplement (doi:10.1039/d4se01252f), 2024-12-17
Supplement: d4se01252f1.pdf [file d4se01252f1.pdf]

Supporting Information for

Influence of loblolly pine anatomical fractions and tree age on oil yield and composition during fast  
pyrolysis

Number of Tables: 8

Number of Figures: 0

**Table SI-1: Loblolly Pine Feedstock GUID for identification in Biomass Feedstock Library**  
<https://bioenergylibrary.inl.gov>

| <b>Feedstock</b>                                  | <b>feedstock BFL GUID</b>            |
|---------------------------------------------------|--------------------------------------|
| Needles (A)                                       | 7fb1ec5d-462a-4a2f-9aea-9ddaa9689993 |
| Needles (A)                                       | e8503c34-770b-4b91-96f2-e045f584fede |
| Bark (A)                                          | 72fbd035-5eaa-4136-a094-b4c8bb5c97ac |
| Bark (A)                                          | 72ab1304-c6e6-4e15-8ae9-818fa5dc6ef9 |
| Stemwood (A)                                      | cc3da623-4306-43bb-89fb-a5102bbe44e7 |
| Stemwood (A)                                      | 9e636aa1-72ba-4609-855b-3b481bb60fd5 |
| Stemwood (D)                                      | ed3c91f8-be20-4177-a810-57aa46d11e02 |
| Residues (A)                                      | 3a76859e-a064-48c7-99c3-b132d85f16b7 |
| Residues (A) Replicate                            | f8cf9023-4b33-4f9d-88c0-01afbb9f82d7 |
| Residues (A) AC 10Hz                              | 08d8b21f-8cc8-47bd-a2bf-4b0f8311c277 |
| Residues (A) AC 28Hz                              | 37347643-0679-4923-802b-cd8c7ac332ca |
| Residues (B)                                      | b8fd8877-13b0-4249-b6d4-ab9736b201ae |
| Residues (B) Replicate                            | 3fb34f82-f4aa-40f2-8683-8b8454186293 |
| Whole Tree (D)                                    | 80c335c3-d4c6-4fb0-81f6-6220222af89a |
| Bark (A) and Needles (A) 1:1 mix                  | cb3a8400-a04d-49aa-bb38-66bdca649575 |
| Stemwood (A) and Needles (A) 1:1 mix              | 3e6de1aa-9e37-4e76-abb6-82d99393ed02 |
| Residues (B), Bark (A), and Needles (A) 1:1:1 mix | 13b752de-916a-408d-be73-09c849b93918 |
| Residues (B), Bark (A), and Needles (A) 1:2:2 mix | b6c7947a-cbde-4e4e-b898-4ded7ca66dd9 |

**Table SI-1b: Feedstock particle size determined by MicroTrac and based on five size bins of data**

| <b>Feedstock</b>       | <b>tree age years</b> | <b>volume-weighted mean</b>      |                      |                   |
|------------------------|-----------------------|----------------------------------|----------------------|-------------------|
|                        |                       | <b>Mean Sauter Dia. (micron)</b> | <b>Length: Width</b> | <b>Sphericity</b> |
| Needles (A)            | 23                    | 125.8                            | 2.3                  | 0.6               |
| Bark (A)               | 23                    | 107.7                            | 1.9                  | 0.7               |
| Stemwood (A)           | 23                    | 122.7                            | 2.7                  | 0.5               |
| Stemwood (D)           | 13                    | 150.4                            | 2.5                  | 0.5               |
| Residues (A) AC 10Hz   | 23                    | 147.8                            | 2.5                  | 0.5               |
| Residues (A) AC 28Hz   | 23                    | 159.6                            | 2.4                  | 0.6               |
| Residues (B)           | 23                    | 144.6                            | 2.2                  | 0.6               |
| Residues (B) Replicate | 23                    | 142.0                            | 2.2                  | 0.6               |
| Whole Tree (D)         | 13                    | 150.8                            | 2.3                  | 0.6               |

**Table SI-2: Comparison of actual and predicted (weighted average) volatile matter and fixed carbon measurement of feedstock mixtures**

| <b>Feedstock</b>                          | <b>Volatile Matter</b> | <b>Fixed Carbon</b> |
|-------------------------------------------|------------------------|---------------------|
| Bark (A) and Needles (A) 1:1 mix measured | 68.30                  | 24.35               |

|                                                             |       |       |
|-------------------------------------------------------------|-------|-------|
| Bark (A) and Needles (A) 1:1 mix predicted                  | 71.14 | 24.20 |
| Stemwood (A) and Needles (A) 1:1 mix measured               | 76.31 | 17.16 |
| Stemwood (A) and Needles (A) 1:1 mix predicted              | 76.07 | 19.04 |
| Residues (B), Bark (A), and Needles (A) 1:1:1 mix measured  | 69.02 | 23.75 |
| Residues (B), Bark (A), and Needles (A) 1:1:1 mix predicted | 71.64 | 23.05 |
| Residues (B), Bark (A), and Needles (A) 1:2:2 mix measured  | 68.57 | 24.12 |
| Residues (B), Bark (A), and Needles (A) 1:2:2 mix predicted | 71.44 | 23.51 |

Table SI-3: Quantification of ash species in feedstock ash fraction (subset of feedstocks analyzed)

| Feedstock                                         | Ash content, % w/wt                     |              |                                         |                          |              |              |                            |                                       |                           |                           |                         |
|---------------------------------------------------|-----------------------------------------|--------------|-----------------------------------------|--------------------------|--------------|--------------|----------------------------|---------------------------------------|---------------------------|---------------------------|-------------------------|
|                                                   | Al as<br>Al <sub>2</sub> O <sub>3</sub> | Ca as<br>CaO | Fe as<br>Fe <sub>2</sub> O <sub>3</sub> | K as<br>K <sub>2</sub> O | Mg as<br>MgO | Mn as<br>MnO | Na as<br>Na <sub>2</sub> O | P as<br>P <sub>2</sub> O <sub>5</sub> | Si as<br>SiO <sub>2</sub> | Ti as<br>TiO <sub>2</sub> | S as<br>SO <sub>3</sub> |
| Needles (A)                                       | 4.88                                    | 8.71         | 1.19                                    | 10.61                    | 3.99         | 0.9          | 0.97                       | 4.92                                  | 53.85                     | 0.55                      | 2.68                    |
| Bark (A)                                          | 13.87                                   | 33.67        | 1.34                                    | 13.04                    | 8            | 1.47         | 0.75                       | 4.64                                  | 18.69                     | 0.18                      | 4.97                    |
| Stemwood (A)                                      | 2.57                                    | 29.32        | 1.8                                     | 16.34                    | 10.87        | 3.18         | 0.94                       | 3.14                                  | 17.82                     | 0.24                      | 3.5                     |
| Stemwood (D)                                      | 1.92                                    | 26.55        | 0.86                                    | 23.12                    | 10.19        | 2.33         | 0.24                       | 5.04                                  | 8.34                      | 0.09                      | 3.7                     |
| Residues (A) AC 10Hz                              | 3.02                                    | 19.28        | 0.52                                    | 21.22                    | 8.4          | 2.22         | 0.2                        | 5.98                                  | 23.15                     | 0.04                      | 3.58                    |
| Residues (A) AC 28Hz                              | 2.66                                    | 20.24        | 1.03                                    | 19.49                    | 9.89         | 2.22         | 0.39                       | 4.62                                  | 13.71                     | 0.13                      | 3.75                    |
| Residues (B)                                      | 4.42                                    | 22.58        | 1.28                                    | 16.92                    | 9.14         | 1.6          | 0.42                       | 5.63                                  | 32.7                      | 0.09                      | 3.95                    |
| Residues (B) Replicate                            | 4.08                                    | 19.26        | 1.37                                    | 15.72                    | 7.87         | 1.42         | 0.4                        | 5.05                                  | 34.08                     | 0.09                      | 3.46                    |
| Whole Tree (D)                                    | 3.65                                    | 25.05        | 0.52                                    | 23.19                    | 9.32         | 1.95         | 0.23                       | 6.46                                  | 10.08                     | 0.08                      | 3.86                    |
| Bark (A) and Needles (A) 1:1 mix                  | 6.19                                    | 11.03        | 1.31                                    | 9.04                     | 4.44         | 0.72         | 1.07                       | 4.39                                  | 50.36                     | 0.6                       | 2.96                    |
| Residues (B), Bark (A), and Needles (A) 1:1:1 mix | 5.82                                    | 13.83        | 1.35                                    | 11.38                    | 5.3          | 1.02         | 0.86                       | 4.7                                   | 43.88                     | 0.45                      | 2.92                    |
| Residues (B), Bark (A), and Needles (A) 1:2:2 mix | 6.4                                     | 13.34        | 1.4                                     | 10.89                    | 4.96         | 1            | 0.9                        | 4.42                                  | 43.98                     | 0.44                      | 3.14                    |

Ash content measured using ICP-OES after ashing at 750C for 8 hours, ASTM D6349

Table SI-4: Compositional Analysis of subset of feedstocks

| Feedstock                                         | Water<br>Extractable | Ethanol<br>Extractives | Acetone<br>Extractives | Lignin | Glucan | Xylan | Galactan | Arabinan | Mannan | Acetyl | Total % |
|---------------------------------------------------|----------------------|------------------------|------------------------|--------|--------|-------|----------|----------|--------|--------|---------|
| Needles (A)                                       | 5.95                 | 1.35                   | 7.35                   | 41.03  | 22.33  | 4.12  | 2.57     | 1.52     | 7.44   | 0.98   | 98.42   |
| Bark (A)                                          | 4.64                 | 0.96                   | 6.36                   | 50.21  | 20.77  | 4.03  | 2.99     | 1.82     | 5.67   | 0.62   | 98.76   |
| Stemwood (A)                                      | 2.76                 | 0.31                   | 2.57                   | 30.7   | 39.84  | 6.3   | 2.59     | 0        | 14.94  | 1.35   | 101.37  |
| Residues (A) AC 10Hz                              | 3.26                 | 0.44                   | 4.02                   | 35.11  | 31.99  | 7.63  | 3.63     | 1.34     | 10.02  | 1.18   | 99.5    |
| Residues (A) AC 28Hz                              | 1.76                 | 0.31                   | 2.4                    | 35.23  | 34.37  | 8.39  | 3.9      | 0        | 12.41  | 1.24   | 100.6   |
| Residues (B)                                      | 6.18                 | 0.68                   | 7.88                   | 35.22  | 26.48  | 6.52  | 3.44     | 2.84     | 6.33   | 0.94   | 97.94   |
| Residues (B) Replicate                            | 4.91                 | 0.62                   | 6.6                    | 35.52  | 28.18  | 7.33  | 3.56     | 1.93     | 7.64   | 0.95   | 98.54   |
| Bark (A) and Needles (A) 1:1 mix                  | 4.01                 | 0.98                   | 5.53                   | 45.88  | 22.75  | 4.17  | 3.28     | 2.4      | 5.35   | 0.81   | 97.57   |
| Residues (B), Bark (A), and Needles (A) 1:1:1 mix | 5.76                 | 1.02                   | 6.87                   | 42.06  | 23.37  | 5.07  | 2.95     | 1.62     | 7.55   | 0.9    | 98.86   |
| Residues (B), Bark (A), and Needles (A) 1:2:2 mix | 5.53                 | 1.04                   | 6.51                   | 42.9   | 22.92  | 4.64  | 3.03     | 2.23     | 5.91   | 0.85   | 97.68   |

LAP reference: J. Sluiter and A. D. Sluiter, *Summative mass closure: Laboratory analytical procedure (LAP) review and integration*, National Renewable Energy Laboratory, Golden, CO, 2011.

**Table SI-5: Cost contribution of each supply chain stage to the MFSP for each feedstock. “Whole Tree + Residues” represents a case considering the harvesting, preprocessing, and conversion of both feedstocks (36% residues and 64% thinnings(whole tree), based on supply availability from a single harvest area).**

| Feedstock                | \$/GGE |                   |            |       |
|--------------------------|--------|-------------------|------------|-------|
|                          | Supply | Preprocessin<br>g | Conversion | Total |
| Whole Tree (D)           | 1.52   | 0.62              | 2.46       | 4.61  |
| Residues (B)             | 1.06   | 0.62              | 2.66       | 4.34  |
| Whole Tree +<br>Residues | 1.39   | 0.62              | 2.53       | 4.54  |

**Table SI-6: LCI for 23-year-old Residues, 13-year-old whole tree (thinnings) and mixture. “Whole Tree + Residues” represents a case considering the harvesting, preprocessing, and conversion of both feedstocks (36% residues and 64% thinnings(whole tree), based on supply availability from a single harvest area).**

|                                                                   | Flow Rate (lb/h) |                   |                          |
|-------------------------------------------------------------------|------------------|-------------------|--------------------------|
|                                                                   | Residues<br>(B)  | Whole Tree<br>(D) | Whole Tree +<br>Residues |
| <b>Products</b>                                                   |                  |                   |                          |
| Gasoline fuel                                                     | 15602            | 15125             | 15298                    |
| Diesel fuel                                                       | 12307            | 11612             | 11865                    |
| Total                                                             | 27909            | 26737             | 27163                    |
| <b>Byproducts</b>                                                 |                  |                   |                          |
| Excess electricity                                                | 12682            | 14457             | 13813                    |
| MEK (2-butanone)                                                  | 1165             | 1165              | 1165                     |
| Acetone                                                           | 4912             | 4897              | 4902                     |
| <b>Resource Consumption</b>                                       |                  |                   |                          |
| Blended woody biomass (wet)                                       | 204131           | 204131            | 204131                   |
| Blended woody biomass (dry)                                       | 183718           | 183718            | 183718                   |
| Sand makeup                                                       | 155              | 155               | 155                      |
| Natural gas a                                                     | 158              | 177               | 170                      |
| Zeolite catalyst                                                  | 0                | 0                 | 0                        |
| Fixed-bed VPU catalyst (0.5% Pt/TiO <sub>2</sub> )                | 7                | 7                 | 7                        |
| Hydrotreating catalyst (sulfided CoMo)                            | 11               | 11                | 11                       |
| Hydrocracking catalyst (crystalline Si-Al with rare-earth metals) | 2                | 2                 | 2                        |
| ZnO (reforming cleanup)                                           | 0.0401           | 0.0449            | 0.0432                   |
| HDS (reforming cleanup)                                           | 0.0172           | 0.0192            | 0.0185                   |
| Steam reforming catalyst                                          | 0.0887           | 0.0992            | 0.0954                   |
| Shift catalyst                                                    | 0.121            | 0.136             | 0.13                     |
| PSA adsorbent                                                     | 3.04             | 3.4               | 3.27                     |
| 50 wt % caustic                                                   | 289              | 289               | 289                      |
| Net water makeup                                                  | 73713            | 73526             | 73594                    |

|                                          |        |        |        |
|------------------------------------------|--------|--------|--------|
| Boiler feed water chemicals              | 2      | 2      | 2      |
| Cooling tower chemicals                  | 1      | 1      | 1      |
| No. 2 diesel fuel                        | 71     | 71     | 71     |
| <b>Waste Streams</b>                     |        |        |        |
| Solids purge from fluidized bed reactors | 5345   | 5541   | 5470   |
| Wastewater                               | 23221  | 22921  | 23030  |
| <b>Air Emissions</b>                     |        |        |        |
| CO2 (fossil)                             | 433    | 484    | 466    |
| CO2 (biogenic)                           | 217319 | 220833 | 219558 |
| CH4                                      | 0      | 0      | 0      |
| CO                                       | 0      | 0      | 0      |
| NO2                                      | 11     | 12     | 12     |
| SO2                                      | 105    | 105    | 105    |
| H2O                                      | 144287 | 145995 | 145375 |
| H2S                                      | 0      | 0      | 0      |

Table SI-7: Compounds quantified via GC-MS analysis of pyrolysis oils in cases where 75 wt.% or more of liquid yield was collected for analysis. Blank indicates below detection limit.

| Feedstock                                   | Needles (A)                      | Stemwood (A) | Stemwood (A) | Residues (A) | Residues (A) Replicate | Residues (A) AC28Hz | Residues (B) Replicate | Whole Tree (D) | Residues (B), Bark (A), and Needles (A) 1:1:1 mix |
|---------------------------------------------|----------------------------------|--------------|--------------|--------------|------------------------|---------------------|------------------------|----------------|---------------------------------------------------|
| Year Analyzed                               | 2022                             | 2021         | 2022         | 2022         | 2022                   | 2021                | 2021                   | 2021           | 2021                                              |
| Compound                                    | weight percent of liquid product |              |              |              |                        |                     |                        |                |                                                   |
| .beta.-D-Glucopyranose, 1,6-anhydro-        | 3.73                             | 3.28         | 3.35         | 2.29         | 2.72                   | 2.83                | 2.81                   | 1.99           | 2.16                                              |
| 1,2-Cyclopentanediol                        | 0.04                             | 0.82         | 0.72         | 0.17         | 0.12                   | 0.63                | 0.14                   | 0.61           | 0.09                                              |
| 1,2-Cyclopentanediol, 3-methyl-             | 0.26                             |              | 0.43         | 0.35         | 0.28                   |                     |                        |                |                                                   |
| 1,2-Ethanediol                              |                                  | 0.41         |              |              |                        | 0.46                | 0.24                   | 0.39           | 0.09                                              |
| 1-Hydroxy-2-butanone                        | 0.09                             | 0.11         | 0.11         | 0.10         | 0.10                   | 0.20                | 0.10                   | 0.19           | 0.10                                              |
| 1-Octanol, 2,7-dimethyl-                    |                                  | 0.25         |              |              |                        | 0.19                | 0.12                   | 0.15           | 0.07                                              |
| 2(3H)-Furanone, dihydro-4-hydroxy-          | 0.08                             |              | 0.04         | 0.07         | 0.08                   |                     |                        |                |                                                   |
| 2(3H)-Furanone, 5-methyl-                   |                                  | 0.04         |              |              |                        | 0.05                | 0.02                   | 0.04           | 0.04                                              |
| 2(5H)-Furanone                              | 0.38                             | 0.55         | 0.66         | 0.48         | 0.43                   | 0.62                | 0.40                   | 0.57           | 0.34                                              |
| 2(5H)-Furanone, 5-methyl-                   |                                  | 0.06         |              |              |                        | 0.10                | 0.07                   | 0.09           | 0.07                                              |
| 2,3-Butanedione                             | 0.15                             | 0.05         | 0.14         | 0.16         | 0.15                   | 0.07                | 0.06                   | 0.06           | 0.07                                              |
| 2-Butanone                                  | 0.13                             | 0.08         | 0.14         | 0.15         | 0.03                   | 0.10                | 0.06                   | 0.12           | 0.06                                              |
| 2-Butenal                                   |                                  | 0.05         |              |              |                        | 0.05                | 0.03                   | 0.05           | 0.03                                              |
| 2-Cyclopenten-1-one                         | 0.12                             | 0.16         | 0.15         | 0.19         | 0.16                   | 0.22                | 0.19                   | 0.24           | 0.24                                              |
| 2-Cyclopenten-1-one, 2-hydroxy-3-methyl-    |                                  | 0.30         |              |              |                        | 0.36                | 0.29                   | 0.38           | 0.33                                              |
| 2-Cyclopenten-1-one, 2-methyl-              | 0.03                             | 0.04         | 0.04         | 0.05         | 0.04                   | 0.05                | 0.05                   | 0.06           | 0.07                                              |
| 2-Cyclopenten-1-one, 3-methyl-              | 0.03                             | 0.12         | 0.04         | 0.05         | 0.04                   | 0.14                | 0.12                   | 0.15           | 0.14                                              |
| 2-Furancarboxaldehyde, 5-methyl-            | 0.05                             | 0.04         | 0.05         | 0.07         | 0.06                   | 0.04                | 0.04                   | 0.05           | 0.08                                              |
| 2-Furanmethanol                             |                                  | 0.05         |              |              |                        | 0.05                | 0.05                   | 0.06           | 0.04                                              |
| 2-Methoxy-4-vinylphenol                     | 0.14                             | 0.44         | 0.27         | 0.30         | 0.18                   | 0.46                | 0.35                   | 0.47           | 0.45                                              |
| 2-Pentanone, 4-hydroxy-4-methyl-            | 0.04                             |              | 0.07         | 0.05         | 0.05                   |                     |                        |                |                                                   |
| 2-Propanone, 1-(4-hydroxy-3-methoxyphenyl)- |                                  | 0.08         |              |              |                        | 0.17                | 0.18                   | 0.12           | 0.11                                              |
| 2-Propanone, 1-(acetyloxy)-                 | 0.09                             | 0.05         | 0.09         | 0.11         | 0.09                   | 0.10                | 0.08                   | 0.11           | 0.11                                              |
| 2-Propanone, 1-hydroxy-                     | 1.95                             | 1.79         | 2.56         | 1.73         | 2.08                   | 2.49                | 1.51                   | 2.46           | 1.12                                              |
| 3-Hexanone                                  |                                  | 0.02         |              |              |                        | 0.02                | 0.02                   | 0.03           | 0.03                                              |
| 3-Pentanone                                 |                                  | 0.17         |              |              |                        | 0.15                | 0.08                   | 0.22           | 0.10                                              |
| 4-(1-Hydroxyallyl)-2-methoxyphenol          | 0.02                             | 0.08         | 0.06         | 0.04         | 0.04                   | 0.09                | 1.25                   | 0.06           | 0.04                                              |
| 4-Methyl-5H-furan-2-one                     |                                  | 0.13         |              |              |                        | 0.14                | 0.10                   | 0.14           | 0.11                                              |
| 5-Hydroxymethylfurfural                     | 0.24                             | 0.49         | 0.58         | 0.29         | 0.27                   | 0.32                | 0.22                   | 0.24           | 0.16                                              |
| Acetaldehyde, hydroxy-                      | 4.80                             | 7.11         | 11.14        | 5.32         | 7.08                   | 4.14                | 3.19                   | 6.14           | 1.64                                              |
| Acetic acid                                 | 2.50                             | 1.19         | 2.05         | 1.80         | 1.97                   | 1.42                | 1.12                   | 1.49           | 1.01                                              |
| Acetic acid, (acetyloxy)-                   | 0.65                             | 0.72         | 1.00         | 0.63         | 0.70                   | 0.52                | 0.38                   | 0.63           | 0.26                                              |
| Apocynin                                    | 0.05                             | 0.20         | 0.11         | 0.08         | 0.08                   | 0.18                | 0.13                   | 0.13           | 0.12                                              |
| Benzenepropanol, 4-hydroxy-3-methoxy-       | 0.02                             |              | 0.06         | 0.05         | 0.06                   |                     |                        |                |                                                   |
| Benzo-furan, 2,3-dihydro-                   |                                  | 0.02         |              |              |                        | 0.04                | 0.07                   | 0.04           | 0.11                                              |
| Butyrolactone                               | 0.07                             |              | 0.10         | 0.09         | 0.08                   |                     |                        |                |                                                   |
| Catechol                                    |                                  | 0.07         |              |              |                        | 0.18                | 0.22                   | 0.17           | 0.27                                              |
| Coniferyl alcohol-E                         | 0.13                             | 0.00         | 0.00         | 0.18         | 0.10                   | 0.11                | 0.37                   | 0.37           | 0.30                                              |
| Coniferyl alcohol-Z                         | 0.03                             | 0.02         | 0.04         | 0.05         | 0.05                   | 0.15                | 0.12                   | 0.13           | 0.09                                              |
| Coniferyl aldehyde                          | 0.05                             | 0.19         | 0.13         | 0.12         | 0.11                   | 0.49                | 0.36                   | 0.34           | 0.31                                              |
| Creosol                                     | 0.19                             | 0.52         | 0.37         | 0.42         | 0.34                   | 0.50                | 0.45                   | 0.54           | 0.69                                              |
| Cyclopent-4-ene-1,3-dione                   | 0.02                             |              | 0.05         | 0.05         | 0.03                   |                     |                        |                |                                                   |
| D-Allose                                    |                                  | 0.11         |              |              |                        | 0.31                | 0.30                   | 0.22           | 0.22                                              |
| D-Limonene                                  | 0.03                             | 0.00         | 0.00         | 0.03         | 0.02                   | 0.00                | 0.05                   | 0.00           | 0.13                                              |
| d-Mannose                                   |                                  | 0.13         |              |              |                        | 0.25                | 0.29                   | 0.16           | 0.18                                              |
| Eugenol                                     | 0.04                             | 0.25         | 0.09         | 0.14         | 0.11                   | 0.28                | 0.21                   | 0.24           | 0.36                                              |
| Furan, 2,5-dimethyl-                        | 0.06                             |              | 0.05         | 0.05         | 0.01                   |                     |                        |                |                                                   |
| Formaldehyde                                |                                  | 0.02         |              |              |                        | 0.02                | 0.01                   | 0.02           | 0.00                                              |
| Furfural                                    | 0.23                             | 0.25         | 0.37         | 0.39         | 0.33                   | 0.32                | 0.26                   | 0.31           | 0.46                                              |
| Glycerin                                    |                                  | 0.06         |              |              |                        | 0.09                | 0.04                   | 0.07           | 0.05                                              |
| Glycolaldehyde dimer                        |                                  | 0.41         |              |              |                        | 0.53                | 0.21                   | 0.23           | 0.09                                              |
| Homovanillic acid                           | 0.03                             | 0.17         | 0.05         | 0.06         | 0.05                   | 0.19                | 0.14                   | 0.12           | 0.10                                              |
| Hydroquinone                                | 0.06                             |              | 0.04         | 0.05         | 0.05                   |                     |                        |                |                                                   |
| Methyl Alcohol                              |                                  | 0.68         |              |              |                        | 1.08                | 1.03                   | 0.99           | 0.77                                              |
| Methyl vinyl ketone                         | 0.05                             |              | 0.02         | 0.04         | 0.03                   |                     |                        |                |                                                   |
| p-Cresol                                    | 0.07                             | 0.07         | 0.04         | 0.09         | 0.07                   | 0.10                | 0.16                   | 0.13           | 0.32                                              |
| Phenol                                      | 0.13                             | 0.07         | 0.07         | 0.15         | 0.13                   | 0.12                | 0.16                   | 0.15           | 0.26                                              |
| Phenol, 2,6-dimethyl-                       | 0.02                             | 0.17         | 0.04         | 0.05         | 0.04                   | 0.09                | 0.09                   | 0.11           | 0.10                                              |
| Phenol, 2-methoxy-                          | 0.22                             | 0.40         | 0.35         | 0.35         | 0.30                   | 0.49                | 0.37                   | 0.51           | 0.51                                              |
| Phenol, 2-methoxy-3-(2-propenyl)-           | 0.05                             |              | 0.11         | 0.14         | 0.11                   |                     |                        |                |                                                   |
| Phenol, 2-methoxy-4-(1-propenyl)-           | 0.01                             |              | 0.03         | 0.03         | 0.02                   |                     |                        |                |                                                   |
| Phenol, 2-methoxy-4-propyl-                 | 0.00                             |              | 0.12         | 0.05         | 0.05                   |                     |                        |                |                                                   |
| Phenol, 2-methoxy-4-(1-propenyl)-, (Z)-     |                                  | 0.48         |              |              |                        | 0.51                | 0.41                   | 0.47           | 0.57                                              |
| Phenol, 2-methoxy-4-propyl-                 |                                  | 0.15         |              |              |                        | 0.11                | 0.04                   | 0.08           | 0.02                                              |
| Phenol, 4-ethyl-2-methoxy-                  |                                  | 0.22         |              |              |                        | 0.17                | 0.17                   | 0.20           | 0.26                                              |
| Phenol, 2-methyl-                           | 0.02                             |              | 0.03         | 0.05         | 0.04                   |                     |                        |                |                                                   |
| Phenol, 3-ethyl-                            | 0.03                             |              | 0.02         | 0.03         | 0.03                   |                     |                        |                |                                                   |
| Phenol, 3-methyl-                           | 0.03                             |              | 0.04         | 0.05         | 0.05                   |                     |                        |                |                                                   |
| Phenol, 4-ethyl-2-methoxy-                  | 0.04                             |              | 0.06         | 0.08         | 0.07                   |                     |                        |                |                                                   |
| Propanoic acid, 2-oxo-, methyl ester        | 0.23                             | 0.35         | 0.47         | 0.30         | 0.20                   | 0.16                | 0.19                   | 0.20           | 0.12                                              |
| Succinaldehyde                              | 0.16                             | 0.58         | 0.78         | 0.47         | 0.47                   | 0.65                | 0.32                   | 0.76           | 0.14                                              |
| trans-Isouugenol                            | 0.28                             | 0.11         | 0.38         | 0.52         | 0.40                   | 0.12                | 0.11                   | 0.12           | 0.15                                              |
| Vanillin                                    | 0.15                             | 0.32         | 0.45         | 0.29         | 0.28                   | 0.30                | 0.19                   | 0.20           | 0.19                                              |

## GC-MS Method Details

Oils were analyzed by gas chromatography with mass spectrometry and simultaneous flame ionization detection (GC-MS-FID). Analysis was conducted using an Agilent 8890 GC equipped with an FID and post column flow splitter. Compounds were qualitatively analyzed using an Agilent 5977B mass selective detector. The column used for compound separation was a Rtx-50 (Restek, 50% phenyl polydimethylsiloxane) of dimensions 30 m x 250  $\mu\text{m}$ , 0.25  $\mu\text{m}$ . Oil samples were diluted 1:10 in acetone for GC analysis. An autosampler (Agilent 7693A) was used to inject 1  $\mu\text{L}$  of diluted sample into a split/splitless inlet held at 275  $^{\circ}\text{C}$  and a split ratio of 100:1. The GC oven was held at 40  $^{\circ}\text{C}$  for 2 min followed by a ramp to 140  $^{\circ}\text{C}$  at 7  $^{\circ}\text{C}/\text{min}$ , then to a final temperature of 290  $^{\circ}\text{C}$  at a rate of 12  $^{\circ}\text{C}/\text{min}$ . The final temperature was held for 10 min. Inert capillary flow restrictors were selected such that the difference in retention times between the FID and MS were within 0.1 minutes. Both FID and the MS transfer line were held at 350  $^{\circ}\text{C}$ . The MS was set to scan from  $m/z$  29 to 300. Compounds were identified by spectral matching with the NIST library, and quantification was conducted using the calibrated FID signal. The detector was calibrated with a mixture of 36 compounds representative compound classes found in fast pyrolysis oils. All compounds had an  $R^2 \geq 0.99$  in the calibration range. For compounds detected that were not in the standard mixture the response factors (RF) were calculated using effective carbon number of the compound identified by M
