# Supplementary material for: Influence of loblolly pine anatomical fractions and tree age on oil yield and composition during fast pyrolysis
Source: Royal Society of Chemistry journal article supplement (doi:10.1039/d4se01252f), 2024-12-17
Supplement: d4se01252f2.xlsx [file d4se01252f2.xlsx]

## Sheet: Sheet1
Table SI-1: Loblolly Pine Feedstock GUID for identification in Biomass Feedstock Library https://bioenergylibrary.inl.gov
Feedstock	feedstock BFL GUID
Needles (A)	7fb1ec5d-462a-4a2f-9aea-9ddaa9689993
Needles (A)	e8503c34-770b-4b91-96f2-e045f584fede
Bark (A)	72fbd035-5eaa-4136-a094-b4c8bb5c97ac
Bark (A)	72ab1304-c6e6-4e15-8ae9-818fa5dc6ef9
Stemwood (A)	cc3da623-4306-43bb-89fb-a5102bbe44e7
Stemwood (A)	9e636aa1-72ba-4609-855b-3b481bb60fd5
Stemwood (D)	ed3c91f8-be20-4177-a810-57aa46d11e02
Residues (A)	f8cf9023-4b33-4f9d-88c0-01afbb9f82d7
Residues (A) AC 10Hz	08d8b21f-8cc8-47bd-a2bf-4b0f8311c277
Residues (A) AC 28Hz	37347643-0679-4923-802b-cd8c7ac332ca
Residues (B)	b8fd8877-13b0-4249-b6d4-ab9736b201ae
Residues (B) Replicate	3fb34f82-f4aa-40f2-8683-8b8454186293
Whole Tree (D)	80c335c3-d4c6-4fb0-81f6-6220222af89a
Bark (A) and Needles (A) 1:1 mix	cb3a8400-a04d-49aa-bb38-66bdca649575
Stemwood (A) and Needles (A) 1:1 mix	3e6de1aa-9e37-4e76-abb6-82d99393ed02
Residues (B), Bark (A), and Needles (A) 1:1:1 mix	13b752de-916a-408d-be73-09c849b93918
Residues (B), Bark (A), and Needles (A) 1:2:2 mix	b6c7947a-cbde-4e4e-b898-4ded7ca66dd9
