# Supplementary material for: Influence of loblolly pine anatomical fractions and tree age on oil yield and composition during fast pyrolysis
Source: Royal Society of Chemistry journal article supplement (doi:10.1039/d4se01252f), 2024-12-17
Supplement: d4se01252f3.xlsx [file d4se01252f3.xlsx]

## Sheet: Sheet1
Table SI-1b: Feedstock particle size determined by MicroTrac and based on five size bins of data
Feedstock	tree age years	volume-weighted mean
		Mean Sauter Dia. (microsn)	Length: Width	Sphericity
Needles (A)	23	125.82	2.303	0.574
Bark (A)	23	107.678	1.891	0.654
Stemwood (A)	23	122.722	2.749	0.51
Stemwood (D)	13	150.442	2.484	0.546
Residues (A) AC 10Hz	23	147.823	2.5	0.544
Residues (A) AC 28Hz	23	159.577	2.427	0.556
Residues (B)	23	144.643	2.189	0.594
Residues (B) Replicate	23	141.995	2.192	0.593
Whole Tree (D)	13	150.787	2.348	0.567
