# Supplementary material for: Influence of loblolly pine anatomical fractions and tree age on oil yield and composition during fast pyrolysis
Source: Royal Society of Chemistry journal article supplement (doi:10.1039/d4se01252f), 2024-12-17
Supplement: d4se01252f4.xlsx [file d4se01252f4.xlsx]

## Sheet: Sheet2
Table SI-2: Comparison of actual and predicted (weighted average) volatile matter and fixed carbon measurement of feedstock mixtures
Feedstock	Volatile Matter	Fixed Carbon
Bark (A) and Needles (A) 1:1 mix measured	68.295	24.345
Bark (A) and Needles (A) 1:1 mix predicted	71.1388	24.1975
Stemwood (A) and Needles (A) 1:1 mix measured	76.31	17.16
Stemwood (A) and Needles (A) 1:1 mix predicted	76.0688	19.0425
Residues (B), Bark (A), and Needles (A) 1:1:1 mix measured	69.02	23.745
Residues (B), Bark (A), and Needles (A) 1:1:1 mix predicted	71.6408	23.0483
Residues (B), Bark (A), and Needles (A) 1:2:2 mix measured	68.57	24.12
Residues (B), Bark (A), and Needles (A) 1:2:2 mix predicted	71.44	23.508
