# Supplementary material for: Influence of loblolly pine anatomical fractions and tree age on oil yield and composition during fast pyrolysis
Source: Royal Society of Chemistry journal article supplement (doi:10.1039/d4se01252f), 2024-12-17
Supplement: d4se01252f5.xlsx [file d4se01252f5.xlsx]

## Sheet: Sheet1
Table SI-3: Quantification of ash species in feedstock ash fraction (subset of feedstocks analyzed)
Feedstock	Ash content, % wt/wt
	Al as Al2O3	Ca as CaO	Fe as Fe2O3	K as K2O	Mg as MgO	Mn as MnO	Na as Na2O	P as P2O5	Si as SiO2	Ti as TiO2	S as SO3
Needles (A)	4.88	8.71	1.19	10.61	3.99	0.9	0.97	4.92	53.85	0.55	2.68
Bark (A)	13.87	33.67	1.34	13.04	8	1.47	0.75	4.64	18.69	0.18	4.97
Stemwood (A)	2.57	29.32	1.8	16.34	10.87	3.18	0.94	3.14	17.82	0.24	3.5
Stemwood (D)	1.92	26.55	0.86	23.12	10.19	2.33	0.24	5.04	8.34	0.09	3.7
Residues (A) AC 10Hz	3.02	19.28	0.52	21.22	8.4	2.22	0.2	5.98	23.15	0.04	3.58
Residues (A) AC 28Hz	2.66	20.24	1.03	19.49	9.89	2.22	0.39	4.62	13.71	0.13	3.75
Residues (B)	4.42	22.58	1.28	16.92	9.14	1.6	0.42	5.63	32.7	0.09	3.95
Residues (B) Replicate	4.08	19.26	1.37	15.72	7.87	1.42	0.4	5.05	34.08	0.09	3.46
Whole Tree (D)	3.65	25.05	0.52	23.19	9.32	1.95	0.23	6.46	10.08	0.08	3.86
Bark (A) and Needles (A) 1:1 mix	6.19	11.03	1.31	9.04	4.44	0.72	1.07	4.39	50.36	0.6	2.96
Residues (B), Bark (A), and Needles (A) 1:1:1 mix	5.82	13.83	1.35	11.38	5.3	1.02	0.86	4.7	43.88	0.45	2.92
Residues (B), Bark (A), and Needles (A) 1:2:2 mix	6.4	13.34	1.4	10.89	4.96	1	0.9	4.42	43.98	0.44	3.14
