# Supplementary material for: Influence of loblolly pine anatomical fractions and tree age on oil yield and composition during fast pyrolysis
Source: Royal Society of Chemistry journal article supplement (doi:10.1039/d4se01252f), 2024-12-17
Supplement: d4se01252f6.xlsx [file d4se01252f6.xlsx]

## Sheet: Sheet2
Table SI-4: Compositional Analysis of subset of feedstocks
Feedstock	Water Extractable	Ethanol Extractives	Acetone Extractives	Lignin	Glucan	Xylan	Galactan	Arabinan	Mannan	Acetyl	Total %
Needles (A)	5.95	1.35	7.35	41.03	22.33	4.12	2.57	1.52	7.44	0.98	98.42
Bark (A)	4.64	0.96	6.36	50.21	20.77	4.03	2.99	1.82	5.67	0.62	98.76
Stemwood (A)	2.76	0.31	2.57	30.7	39.84	6.3	2.59	0	14.94	1.35	101.37
Residues (A) AC 10Hz	3.26	0.44	4.02	35.11	31.99	7.63	3.63	1.34	10.02	1.18	99.5
Residues (A) AC 28Hz	1.76	0.31	2.4	35.23	34.37	8.39	3.9	0	12.41	1.24	100.6
Residues (B)	6.18	0.68	7.88	35.22	26.48	6.52	3.44	2.84	6.33	0.94	97.94
Residues (B) Replicate	4.91	0.62	6.6	35.52	28.18	7.33	3.56	1.93	7.64	0.95	98.54
Bark (A) and Needles (A) 1:1 mix	4.01	0.98	5.53	45.88	22.75	4.17	3.28	2.4	5.35	0.81	97.57
Residues (B), Bark (A), and Needles (A) 1:1:1 mix	5.76	1.02	6.87	42.06	23.37	5.07	2.95	1.62	7.55	0.9	98.86
Residues (B), Bark (A), and Needles (A) 1:2:2 mix	5.53	1.04	6.51	42.9	22.92	4.64	3.03	2.23	5.91	0.85	97.68
