# Supplementary material for: Influence of loblolly pine anatomical fractions and tree age on oil yield and composition during fast pyrolysis
Source: Royal Society of Chemistry journal article supplement (doi:10.1039/d4se01252f), 2024-12-17
Supplement: d4se01252f7.xlsx [file d4se01252f7.xlsx]

## Sheet: Sheet2
Table SI-5: Cost contribution of each supply chain stage to the MFSP for each feedstock. “Whole Tree + Residues” represents a case considering the harvesting, preprocessing, and conversion of both feedstocks (36% residues and 64% thinnings(whole tree), based on supply availability from a single harvest area).
	$/GGE
Feedstock	Supply	Preprocessing	Conversion	Total
Whole Tree (D)	1.52	0.62	2.46	4.61
Residues (B)	1.06	0.62	2.66	4.34
Whole Tree + Residues	1.39	0.62	2.53	4.54
