# Supplementary material for: Influence of loblolly pine anatomical fractions and tree age on oil yield and composition during fast pyrolysis
Source: Royal Society of Chemistry journal article supplement (doi:10.1039/d4se01252f), 2024-12-17
Supplement: d4se01252f8.xlsx [file d4se01252f8.xlsx]

## Sheet: Sheet2
Table SI-6: LCI for 23-year-old Residues, 13-year-old whole tree (thinnings) and mixture. “Whole Tree + Residues” represents a case considering the harvesting, preprocessing, and conversion of both feedstocks (36% residues and 64% thinnings(whole tree), based on supply availability from a single harvest area).
	Flow Rate (lb/h)
	Residues (B)	Whole Tree (D)	Whole Tree + Residues
Products
Gasoline fuel	15602	15125	15298
Diesel fuel	12307	11612	11865
Total	27909	26737	27163
Byproducts
Excess electricity	12682	14457	13813
MEK (2-butanone)	1165	1165	1165
Acetone	4912	4897	4902
Resource Consumption
Blended woody biomass (wet)	204131	204131	204131
Blended woody biomass (dry)	183718	183718	183718
Sand makeup	155	155	155
Natural gas a	158	177	170
Zeolite catalyst	0	0	0
Fixed-bed VPU catalyst (0.5% Pt/TiO2)	7	7	7
Hydrotreating catalyst (sulfided CoMo)	11	11	11
Hydrocracking catalyst (crystalline Si-Al with rare-earth metals)	2	2	2
ZnO (reforming cleanup)	0.0401	0.0449	0.0432
HDS (reforming cleanup)	0.0172	0.0192	0.0185
Steam reforming catalyst	0.0887	0.0992	0.0954
Shift catalyst	0.121	0.136	0.13
PSA adsorbent	3.04	3.4	3.27
50 wt % caustic	289	289	289
Net water makeup	73713	73526	73594
Boiler feed water chemicals	2	2	2
Cooling tower chemicals	1	1	1
No. 2 diesel fuel	71	71	71
Waste Streams
Solids purge from fluidized bed reactors	5345	5541	5470
Wastewater	23221	22921	23030
Air Emissions
CO2 (fossil)	433	484	466
CO2 (biogenic)	217319	220833	219558
CH4	0	0	0
CO	0	0	0
NO2	11	12	12
SO2	105	105	105
H2O	144287	145995	145375
H2S	0	0	0
