# Supplementary material for: Influence of loblolly pine anatomical fractions and tree age on oil yield and composition during fast pyrolysis
Source: Royal Society of Chemistry journal article supplement (doi:10.1039/d4se01252f), 2024-12-17
Supplement: d4se01252f9.xlsx [file d4se01252f9.xlsx]

## Sheet: Sheet2
Table SI-7: Compounds quantified via GC-MS analysis of pyrolysis oils in cases where 75 wt.% or more of liquid yield was collected for analysis. Blank indicates below detection limit.
Feedstock	Needles (A)	Stemwood (A)	Stemwood (A)	Residues (A)	Residues (A) AC 28Hz	Residues (B) Replicate	Whole Tree (D)	Residues (B), Bark (A), and Needles (A) 1:1:1 mix
Year Analyzed	2022	2021	2022	2022	2021	2021	2021	2021
Compound	weight percent of liquid product
.beta.-D-Glucopyranose, 1,6-anhydro-	3.73328	3.28329	3.35356	2.72456	2.82715	2.81364	1.98622	2.15844
1,2-Cyclopentanedione	0.0360557	0.81962	0.723289	0.115379	0.631558	0.141974	0.612424	0.092005
1,2-Cyclopentanedione, 3-methyl-	0.256361		0.432888	0.283078
1,2-Ethanediol		0.412508			0.464925	0.239408	0.385229	0.0907607
1-Hydroxy-2-butanone	0.090536	0.107268	0.113905	0.100783	0.19889	0.103336	0.191917	0.0991727
1-Octanol, 2,7-dimethyl-		0.248881			0.187617	0.11646	0.150405	0.0671118
2(3H)-Furanone, dihydro-4-hydroxy-	0.0755553		0.0414277	0.0782222
2(3H)-Furanone, 5-methyl-		0.0429951			0.0450233	0.0208676	0.0364379	0.0427101
2(5H)-Furanone	0.377692	0.55218	0.661465	0.430801	0.621617	0.404991	0.573635	0.337496
2(5H)-Furanone, 5-methyl-		0.0610884			0.101196	0.0674241	0.0946109	0.0745205
2,3-Butanedione	0.152383	0.0533389	0.143133	0.150611	0.0691458	0.0626389	0.0590386	0.0689523
2-Butanone	0.134688	0.078606	0.135023	0.0335799	0.104801	0.0614743	0.116792	0.0621975
2-Butenal		0.0526191			0.0487762	0.0330789	0.0471809	0.0320375
2-Cyclopenten-1-one	0.123843	0.164933	0.147057	0.156218	0.217481	0.186953	0.241215	0.236561
2-Cyclopenten-1-one, 2-hydroxy-3-methyl-		0.299577			0.356782	0.287773	0.377707	0.329637
2-Cyclopenten-1-one, 2-methyl-	0.0326521	0.0400268	0.0388584	0.0370593	0.0506579	0.048396	0.0571971	0.074694
2-Cyclopenten-1-one, 3-methyl-	0.0330465	0.119724	0.0404217	0.0414093	0.139361	0.116622	0.153702	0.138349
2-Furancarboxaldehyde, 5-methyl-	0.0492497	0.0432303	0.0472244	0.0600977	0.0362482	0.0441769	0.0454496	0.0827975
2-Furanmethanol		0.04767			0.0512136	0.0470013	0.0596773	0.0390648
2-Methoxy-4-vinylphenol	0.140232	0.440648	0.265094	0.177584	0.463502	0.349486	0.470637	0.452482
2-Pentanone, 4-hydroxy-4-methyl-	0.0404552		0.0672205	0.0539986
2-Propanone, 1-(4-hydroxy-3-methoxyphenyl)-		0.0750626			0.172922	0.180014	0.11809	0.110045
2-Propanone, 1-(acetyloxy)-	0.0944193	0.0512007	0.0859215	0.092143	0.0976463	0.0762907	0.114308	0.105633
2-Propanone, 1-hydroxy-	1.95348	1.78715	2.56333	2.08488	2.48779	1.51397	2.45851	1.11829
3-Hexanone		0.0247778			0.0244903	0.0223632	0.0265691	0.0257976
3-Pentanone		0.169592			0.152733	0.0754259	0.220032	0.102781
4-(1-Hydroxyallyl)-2-methoxyphenol	0.0203018	0.0776736	0.0602083	0.0449494	0.0917849	1.25083	0.058507	0.0368652
4-Methyl-5H-furan-2-one		0.125394			0.140047	0.0978439	0.141531	0.112525
5-Hydroxymethylfurfural	0.235616	0.490785	0.581292	0.274663	0.317979	0.222574	0.235035	0.156871
Acetaldehyde, hydroxy-	4.79915	7.11321	11.1356	7.08182	4.13676	3.18548	6.1362	1.64267
Acetic acid	2.49709	1.19089	2.04873	1.97029	1.4176	1.12403	1.48888	1.01007
Acetic acid, (acetyloxy)-	0.652394	0.722494	0.999984	0.701872	0.523949	0.383254	0.630394	0.257268
Apocynin	0.0452637	0.198413	0.107629	0.0813363	0.183779	0.131097	0.127921	0.122222
Benzenepropanol, 4-hydroxy-3-methoxy-	0.0214151		0.0626927	0.0567649
Benzofuran, 2,3-dihydro-		0.0230973			0.0439997	0.0681163	0.0410562	0.108102
Butyrolactone	0.0672746		0.102252	0.0827947
Catechol		0.0724182			0.179516	0.221428	0.167179	0.265599
Coniferyl alcohol-E	0.133504	0	0	0.098654	0.114204	0.365246	0.374921	0.304622
Coniferyl alcohol-Z	0.0299908	0.0168517	0.0363689	0.0535462	0.153844	0.117897	0.128638	0.0909429
Coniferyl aldehyde	0.046184	0.192665	0.132926	0.111583	0.494974	0.36194	0.338255	0.306627
Creosol	0.189013	0.52279	0.366355	0.335507	0.503828	0.454583	0.541807	0.691689
Cyclopent-4-ene-1,3-dione	0.0204006		0.0534624	0.0317752
D-Allose		0.114429			0.306355	0.300253	0.222894	0.223926
D-Limonene	0.0258636	0	0	0.0161684	0	0.0455974	0	0.129585
d-Mannose		0.129207			0.25058	0.287728	0.15511	0.175798
Eugenol	0.0359424	0.245189	0.094102	0.110438	0.280638	0.213668	0.240698	0.355233
Furan, 2,5-dimethyl-	0.0562507		0.0492754	0.00920293
Formaldehyde		0.0239489			0.0202196	0.00958603	0.0165569	0
Furfural	0.232953	0.251347	0.37063	0.334739	0.320893	0.264517	0.310882	0.46407
Glycerin		0.0636222			0.0862797	0.0362395	0.0737121	0.048913
Glycolaldehyde dimer		0.406963			0.528282	0.210482	0.231582	0.0867784
Homovanillic acid	0.0291963	0.168502	0.049818	0.0531823	0.191307	0.136186	0.12307	0.0990067
Hydroquinone	0.0575543		0.0444203	0.0472509
Methyl Alcohol		0.684028			1.07789	1.02981	0.992287	0.767157
Methyl vinyl ketone	0.0515255		0.0173327	0.0259208
p-Cresol	0.072634	0.0687871	0.038381	0.0702646	0.101638	0.162093	0.127329	0.322797
Phenol	0.125033	0.0727371	0.0667663	0.127886	0.122326	0.160676	0.152023	0.264912
Phenol, 2,6-dimethyl-	0.0204391	0.167625	0.0382703	0.0403447	0.08714	0.0941553	0.114932	0.102986
Phenol, 2-methoxy-	0.22089	0.399225	0.351014	0.301592	0.493133	0.365243	0.50935	0.513848
Phenol, 2-methoxy-3-(2-propenyl)-	0.0464378		0.114849	0.107576
Phenol, 2-methoxy-4-(1-propenyl)-	0.0103015		0.0279482	0.0221431
Phenol, 2-methoxy-4-propyl-	0		0.122678	0.0493218
Phenol, 2-methoxy-4-(1-propenyl)-, (Z)-		0.481631			0.507079	0.412523	0.465396	0.57071
Phenol, 2-methoxy-4-propyl-		0.147925			0.114024	0.0353294	0.0824182	0.0187753
Phenol, 4-ethyl-2-methoxy-		0.217484			0.171594	0.165184	0.203277	0.263454
Phenol, 2-methyl-	0.023738		0.0306472	0.0368213
Phenol, 3-ethyl-	0.0263196		0.0219723	0.0279036
Phenol, 3-methyl-	0.031962		0.0433544	0.0466934
Phenol, 4-ethyl-2-methoxy-	0.0432415		0.0615197	0.0678293
Propanoic acid, 2-oxo-, methyl ester	0.227487	0.350492	0.465693	0.204361	0.162119	0.192619	0.196728	0.118761
Succindialdehyde	0.155664	0.58162	0.777779	0.472212	0.650527	0.323082	0.761609	0.141204
trans-Isoeugenol	0.283288	0.114343	0.38321	0.397053	0.121949	0.106376	0.117624	0.153718
Vanillin	0.153765	0.322396	0.45466	0.280194	0.299754	0.194441	0.204376	0.194569
